# Supplementary material for: In situ bifunctional solid acids bearing B–OH and –COOH groups for efficient hydrolysis of cellulose to sugar in a pure aqueous phase
Source: Royal Society of Chemistry journal article supplement (doi:10.1039/d3gc04100j), 2023-12-12
Supplement: d3gc04100j1.pdf [file d3gc04100j1.pdf]

## Supporting Information

### In-situ bifunctional solid acid bearing B-OH and -COOH groups for efficient hydrolysis of cellulose to sugar in pure aqueous phase

Yuhua Chen<sup>1,2</sup>, Chengqi Feng<sup>1,\*</sup>, Chenkai Jin<sup>1</sup>, Yuxin Zhu<sup>1,2</sup>, Juncheng Huang<sup>1</sup>, Haining Na<sup>1,2,\*</sup>, Jin Zhu<sup>1</sup>

1. Key Laboratory of Bio-Based Polymeric Materials of Zhejiang Province, Ningbo Institute of Materials Technology and Engineering, Chinese Academy of Sciences, Ningbo, Zhejiang 315201, China;

2. University of Chinese Academy of Sciences, Beijing 100049, China.

\*Corresponding Author: Dr. Haining Na, nahaining@nimte.ac.cn;

Dr. Chengqi Feng, fengchengqi@nimte.ac.cn.

Tel: +86-574-86689806; Fax: +86-574-86685186.

## CONTENT

**Figure S1.** XRD (a) and FT-IR (b) spectra before and after pretreatment of cellulose.

**Figure S2.** SEM images of P160-6 (a), P160-8 (b), P160-10 (c), BP160-6 (d), BP160-8 (e), BP160-10 (f), BP180-6 (g), BP180-8 (h), and BP180-10 (i).

**Figure S3.** N<sub>2</sub> adsorption-desorption isotherms curve of BP160-10.

**Figure S4.** B element average mass concentration image of BP catalysts obtained at different hydrothermal conditions by ICP-OES.

**Figure S5.** NH<sub>3</sub>-TPD image of BP catalysts (a) and the area diagram of peak integration (b).

**Figure S6.** Images of detailed hydrolysis products at 160 °C/6 h (a) and 180 °C/6 h (b).

**Figure S7.** FT-IR (a), Raman (b) spectra and XPS survey spectra of C 1s (c) and O 1s (d) of BP160-10 before hydrolysis and after hydrolysis at 180 °C and 200 °C.

**Table S1.** Some solid acid-catalyzed hydrolysis reactions of cellulose to glucose.

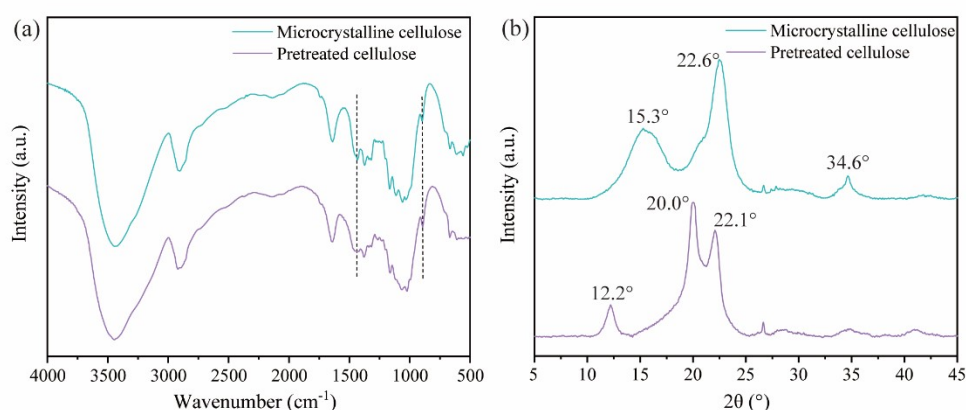

**Figure S1.** XRD (a) and FT-IR (b) spectra before and after pretreatment of cellulose.

After pretreatment of cellulose with phosphoric acid, the crystalline structure of cellulose transforms from natural cellulose I to cellulose II, and its crystallinity also decreases. This crystalline structure transformation is conducive to the catalytic hydrolysis of cellulose by the catalyst. Fig. S1(a) shows the infrared absorption spectra of MCC and pretreated cellulose. Both MCC and pretreated cellulose have the same infrared absorption characteristics, indicating that phosphoric acid pretreatment did not alter the chemical structure of cellulose. The absorption intensity of both slightly changes at  $1430\text{cm}^{-1}$  and  $895\text{cm}^{-1}$ , indicating that the crystal form of cellulose transforms phosphoric acid pretreatment.<sup>1</sup> Fig. S1(b) shows the X-ray diffraction spectra of MCC and pretreated cellulose. The MCC exhibits three distinct diffraction peaks at  $15.3^\circ$ ,  $22.6^\circ$  and  $34.6^\circ$ , which are characteristic of cellulose I structure.<sup>2-4</sup> The crystallinity of MCC is calculated to be 79.97% through peak fitting analysis by using Jade6.5 software. The spectrum of pretreated cellulose shows three diffraction peaks at  $12.2^\circ$ ,  $20.0^\circ$  and  $22.1^\circ$ , belonging to the cellulose II structure.<sup>2,5</sup> The crystallinity of pretreated cellulose is calculated to be 54.35% by Jade6.5 software. Based on the information provided, it can be observed that after phosphoric acid pretreatment, the crystalline structure of cellulose changes from cellulose I to cellulose II, and its crystallinity decreases accordingly. This change in structure and crystallinity makes the cellulose more conducive to solid acid-catalyzed hydrolysis.

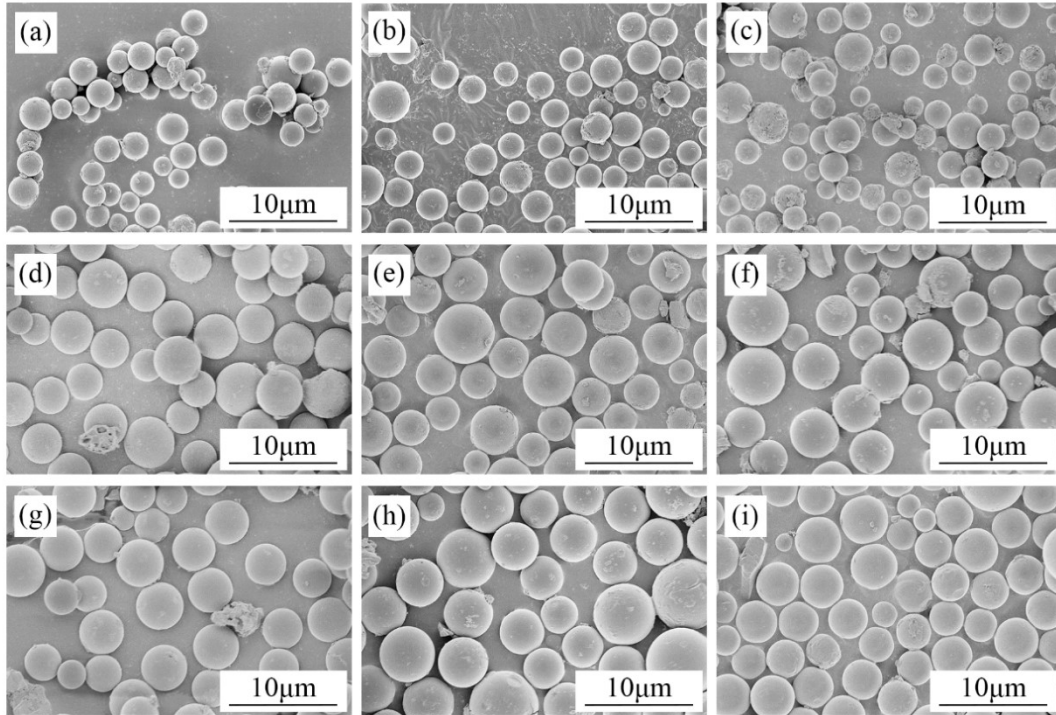

**Figure S2.** SEM images of P160-6 (a), P160-8 (b), P160-10 (c), BP160-6 (d), BP160-8 (e), BP160-10 (f), BP180-6 (g), BP180-8 (h), and BP180-10 (i).

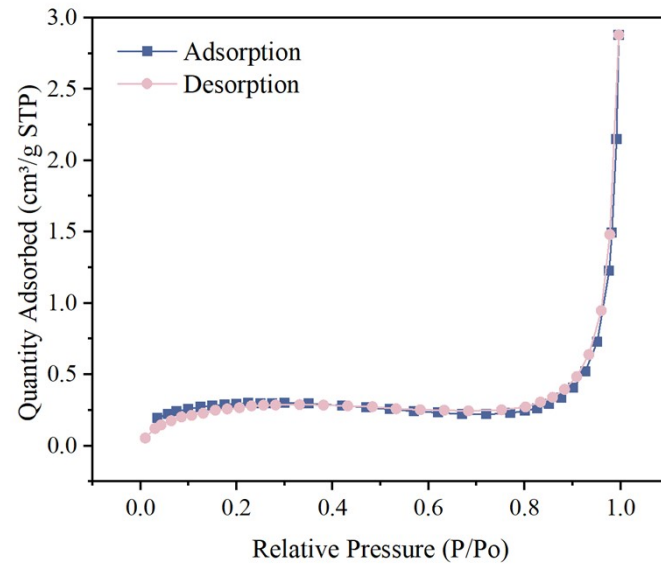

**Figure S3.** N<sub>2</sub> adsorption-desorption isotherms curve of BP160-10.

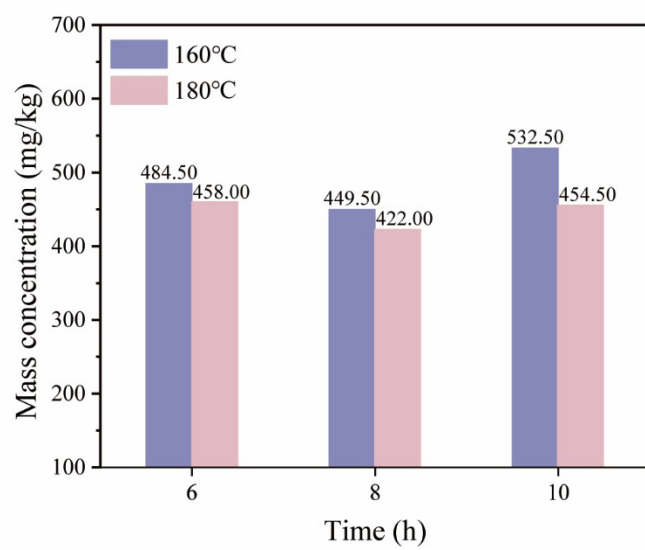

**Figure S4.** B element average mass concentration image of BP catalysts obtained at different hydrothermal conditions by ICP-OES.

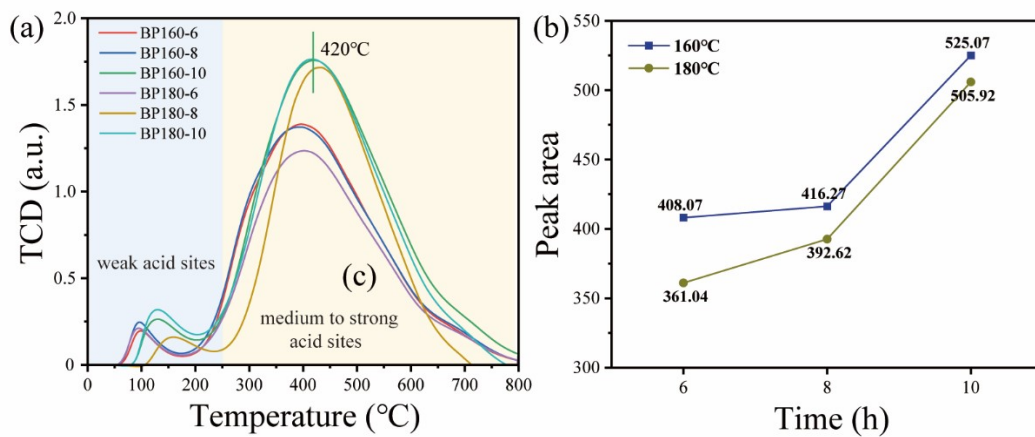

**Figure S5.** NH<sub>3</sub>-TPD image of BP catalysts (a) and the area diagram of peak integration (b).

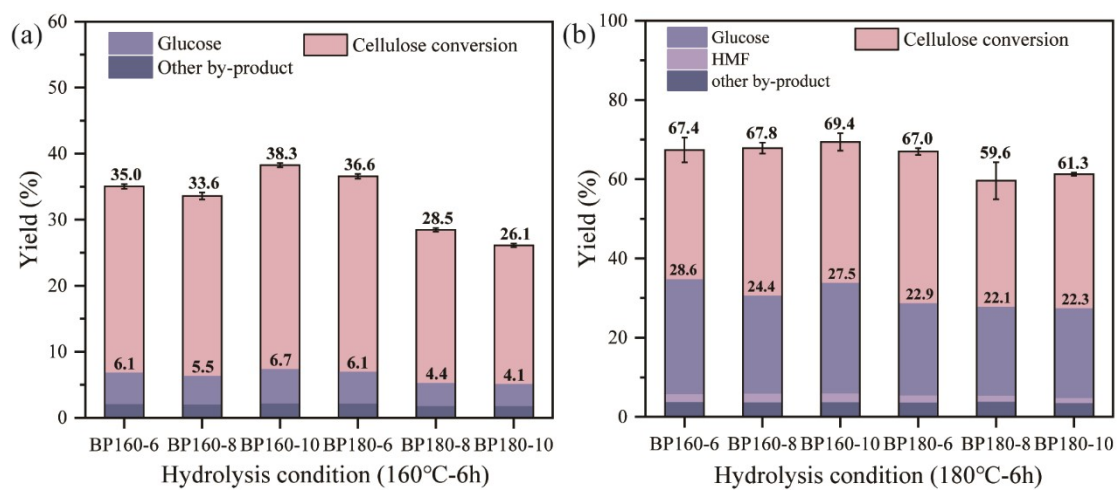

**Figure S6.** Images of detailed hydrolytic products at 160 °C/6 h (a) and 180 °C/6 h (b).

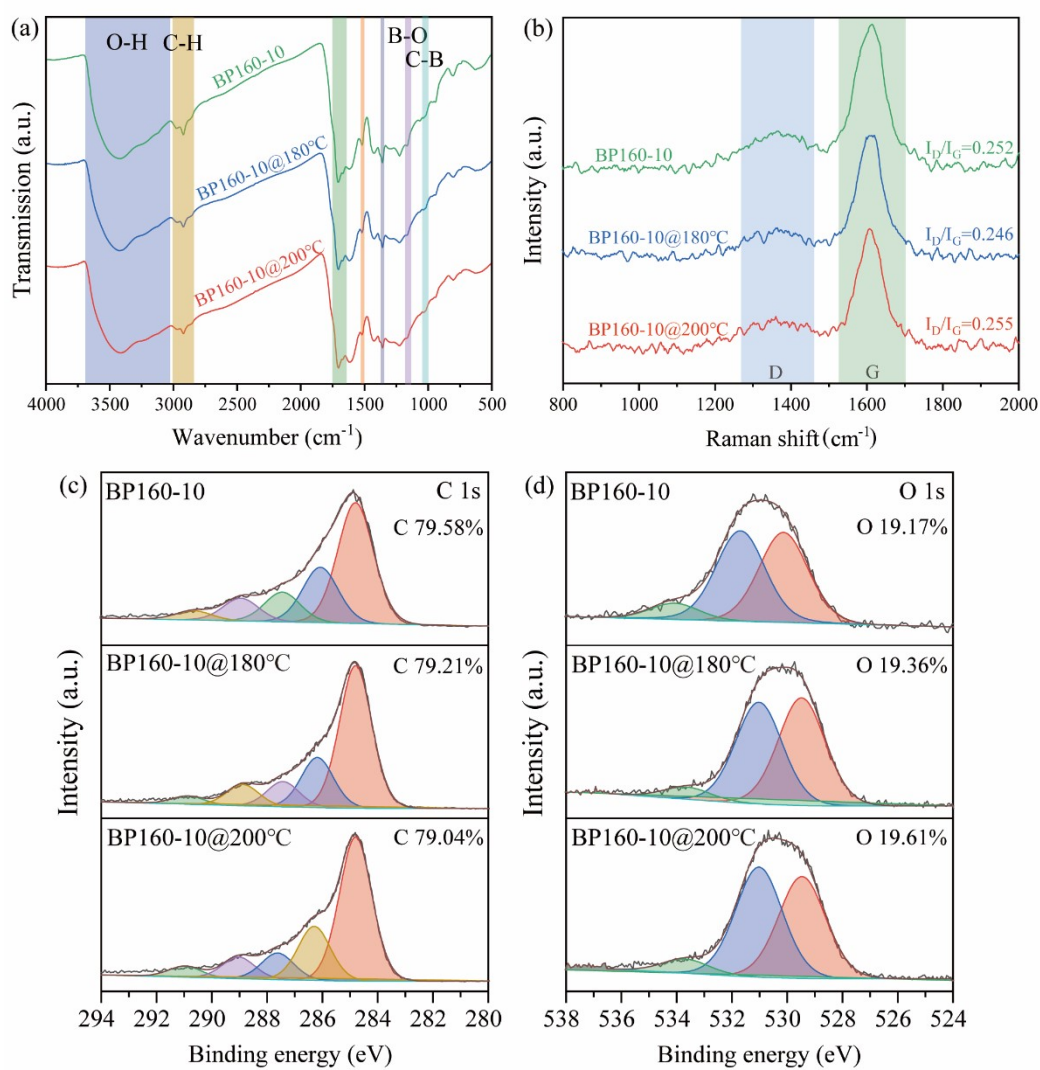

**Figure S7.** FT-IR (a), Raman (b) spectra and XPS survey spectra of C 1s (c) and O 1s (d) of BP160-10 before hydrolysis and after hydrolysis at 180 °C and 200 °C.



**Table S1** Some solid acid-catalyzed hydrolysis reactions of cellulose to glucose.

|    | Catalyst                                        | Solvent          | Reaction<br>condition | Conv.<br>(%) | Glu.<br>(%) | Ref.         |
|----|-------------------------------------------------|------------------|-----------------------|--------------|-------------|--------------|
| 1  | Amberlyst-70                                    | [EMIM][Cl]       | 140 °C, 5h            | -            | 11          | 6            |
| 2  | Si-propyl sulfonic<br>acid                      | [EMIM][Cl]       | 140 °C, 5h            | -            | 40          | 6            |
| 3  | HY zeolite                                      | [EMIM][Cl]       | 130 °C, 4.5h          | -            | 28          | 7            |
| 4  | MCM-48                                          | H <sub>2</sub> O | 230 °C, 0.5h          | -            | 14.1        | 8            |
| 5  | CD-C                                            | H <sub>2</sub> O | 200 °C, 1.5h          | -            | 28.9        | 9            |
| 6  | E-Carbon                                        | H <sub>2</sub> O | 215 °C                | -            | 31          | 10           |
| 7  | BP160-10                                        | H <sub>2</sub> O | 200 °C, 4h            | 97.33        | 38.23       | This<br>work |
| 8  | N-SB                                            | H <sub>2</sub> O | 180 °C, 1h            | 63           | 42          | 11           |
| 9  | SO <sub>4</sub> <sup>2-</sup> /SnO <sub>2</sub> | H <sub>2</sub> O | 190 °C,               | 50.1         | 26.8        | 12           |
| 10 | CNS                                             | H <sub>2</sub> O | 100 °C, 6h            | 47           | 1.17        | 13           |
| 11 | SACOH                                           | H <sub>2</sub> O | 150 °C                | 38           | 10          | 14           |
| 12 | ACOH                                            | H <sub>2</sub> O | 150 °C                | 26           | 2           | 14           |

## References

- [1] Sang Youn Oh, Dong Il Yoo, Younsook Shin, Hwan Chul Kim, Hak Yong Kim, Yong Sik Chung, Won Ho Park, Ji Ho Youk. Crystalline structure analysis of cellulose treated with sodium hydroxide and carbon dioxide by means of X-ray diffraction and FTIR spectroscopy. *Carbohydrate Research*, 2005, 340(15): 2376–2391. DOI: 10.1016/j.carres.2005.08.007
- [2] Juanhua Zhang, Beixiao Zhang, Jingqiang Zhang, Lu Lin, Shijie Liu, Pingkai Ouyang. Effect of phosphoric acid pretreatment on enzymatic hydrolysis of microcrystalline cellulose. *Biotechnology Advances*, 2010, 28(5): 613-619. DOI: 10.1016/j.biotechadv.2010.05.010
- [3] Meghna Diarsa, Akshaya Gupte. Preparation, characterization and its potential applications in isoniazid drug delivery of porous microcrystalline cellulose from banana pseudostem fibers. *3 Biotech*, 2021, 11: 334. DOI: 10.1007/s13205-021-02838-0
- [4] M.K. Mohamad Haafiz, S.J. Eichhorn, Azman Hassan, M. Jawaid. Isolation and characterization of microcrystalline cellulose from oil palm biomass residue. *Carbohydrate Polymers*, 2013, 93(2): 628-634. DOI: 10.1016/j.carbpol.2013.01.035
- [5] Chia-Hung Kuo, Cheng-Kang Lee. Enhancement of enzymatic saccharification of cellulose by cellulose dissolution pretreatments. *Carbohydrate Polymers*, 2009, 77(1): 41–46. DOI: 10.1016/j.carbpol.2008.12.003
- [6] Silvia Morales-delaRosa, Jose M. Campos-Martin, Jose L.G. Fierro. Chemical hydrolysis of cellulose into fermentable sugars through ionic liquids and antisolvent pretreatments using heterogeneous catalysts. *Catalysis Today*, 2018, 302: 87-93. DOI: 10.1016/j.cattod.2017.08.033
- [7] Jie Yu, Jingyun Wang, Zhen Wang, Mingdong Zhou, Haiyan Wang. Catalytic performance of silicalite-1 modified HY zeolite in the hydrolysis of cellulose. *Journal of Fuel Chemistry and Technology*, 2018, 46(12): 1447-1453. DOI: 10.1016/s1872-5813(18)30058-6
- [8] Alberto Romero, Esther Alonso, Álvaro Sastre, Antonio Nieto-Márquez. Conversion of biomass into sorbitol: cellulose hydrolysis on MCM-48 and D-Glucose hydrogenation on Ru/MCM-48. *Microporous and Mesoporous Materials*, 2016, 224: 1-8. DOI: 10.1016/j.micromeso.2015.11.013
- [9] Jialei Su, Mo Qiu, Feng Shen, Xinhua Qi. Efficient hydrolysis of cellulose to glucose in water by agricultural residue-derived solid acid catalyst. *Cellulose*, 2018, 25(1): 17-22. DOI: 10.1007/s10570-017-1603-4
- [10] Hirokazu Kobayashi, Hiroyuki Kaiki, Abhijit Shrotri, Kota Techikawara, Atsushi Fukuoka. Hydrolysis of woody biomass by a biomass-derived reusable heterogeneous catalyst. *Chemical Science*, 2016, 7 (1): 692-696. DOI: 10.1039/c5sc03377b
- [11] Atsushi Gabe, Akira Takatsuki, Masahiko Hiratani, Masato Kaneeda, Yoshiaki Kurihara, Takayuki Aoki, Hiroki Mashima, Takafumi Ishii, Jun-ichi Ozaki, Hirotomo Nishihara, Takashi Kyotani. In-depth analysis of key factors affecting the catalysis of

oxidized carbon blacks for cellulose hydrolysis. *ACS Catalysis*, 2021, 12(2): 892-905. DOI: 10.1021/acscatal.1c04054

[12] Fang Yang, Yang Li, Qian Zhang, Xiaofeng Sun, Hongxian Fan, Nian Xu, Gang Li. Selective conversion of cotton cellulose to glucose and 5-hydroxymethyl furfural with  $\text{SO}_4^{2-}/\text{M}_x\text{O}_y$  solid superacid catalyst. *Carbohydrate Polymers*, 2015, 131: 9-14. DOI: 10.1016/j.carbpol.2015.05.036

[13] Taslim, Dian Halimah Batubara, Seri Maulina, Iriany, Okta Bani. Preparation and characterization of sulfonated carbon from candlenut shell as catalyst for hydrolysis of cogon grass cellulose into glucose. *Asian Journal of Chemistry*, 2020, 32(6): 1404-1408. DOI: 10.14233/ajchem.2020.22613

[14] Guo Shiou Foo, Carsten Sievers. Synergistic effect between defect sites and functional groups on the hydrolysis of cellulose over activated carbon. *ChemSusChem*, 2015, 8(3): 534-543. DOI: 10.1002/cssc.201402928
